# Supplementary material for: Climatology of aerosol components concentration derived by GRASP algorithm from multi-angular polarimetric POLDER-3 observations
Source: Copernicus journal article supplement (doi:10.5194/essd-2022-108), 2022-04-01

Linear trends of BC column concentration

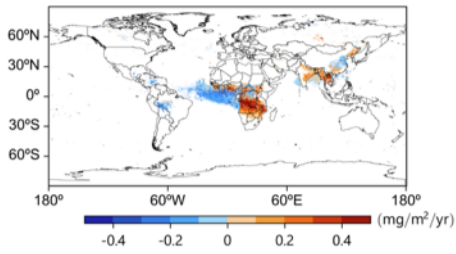

Linear trends of BrC column concentration

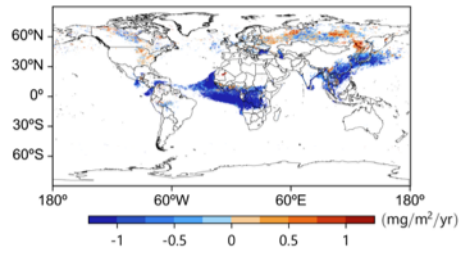

Linear trends of CAI column concentration

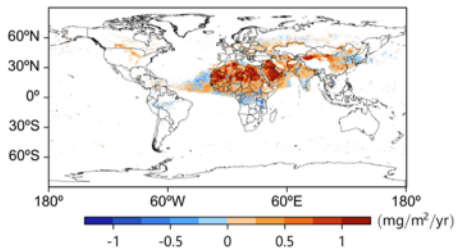

Linear trends of CNAI column concentration

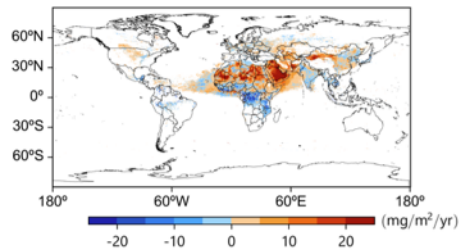

Supplement: Supplementary file [file essd-2022-108-AC3-supplement.pdf]
